# Supplementary material
Source: publisher figshare collection journal article supplement (https://karger.figshare.com/articles/dataset/_/12941660)
Supplement: Supplementary file 1 [file 1]

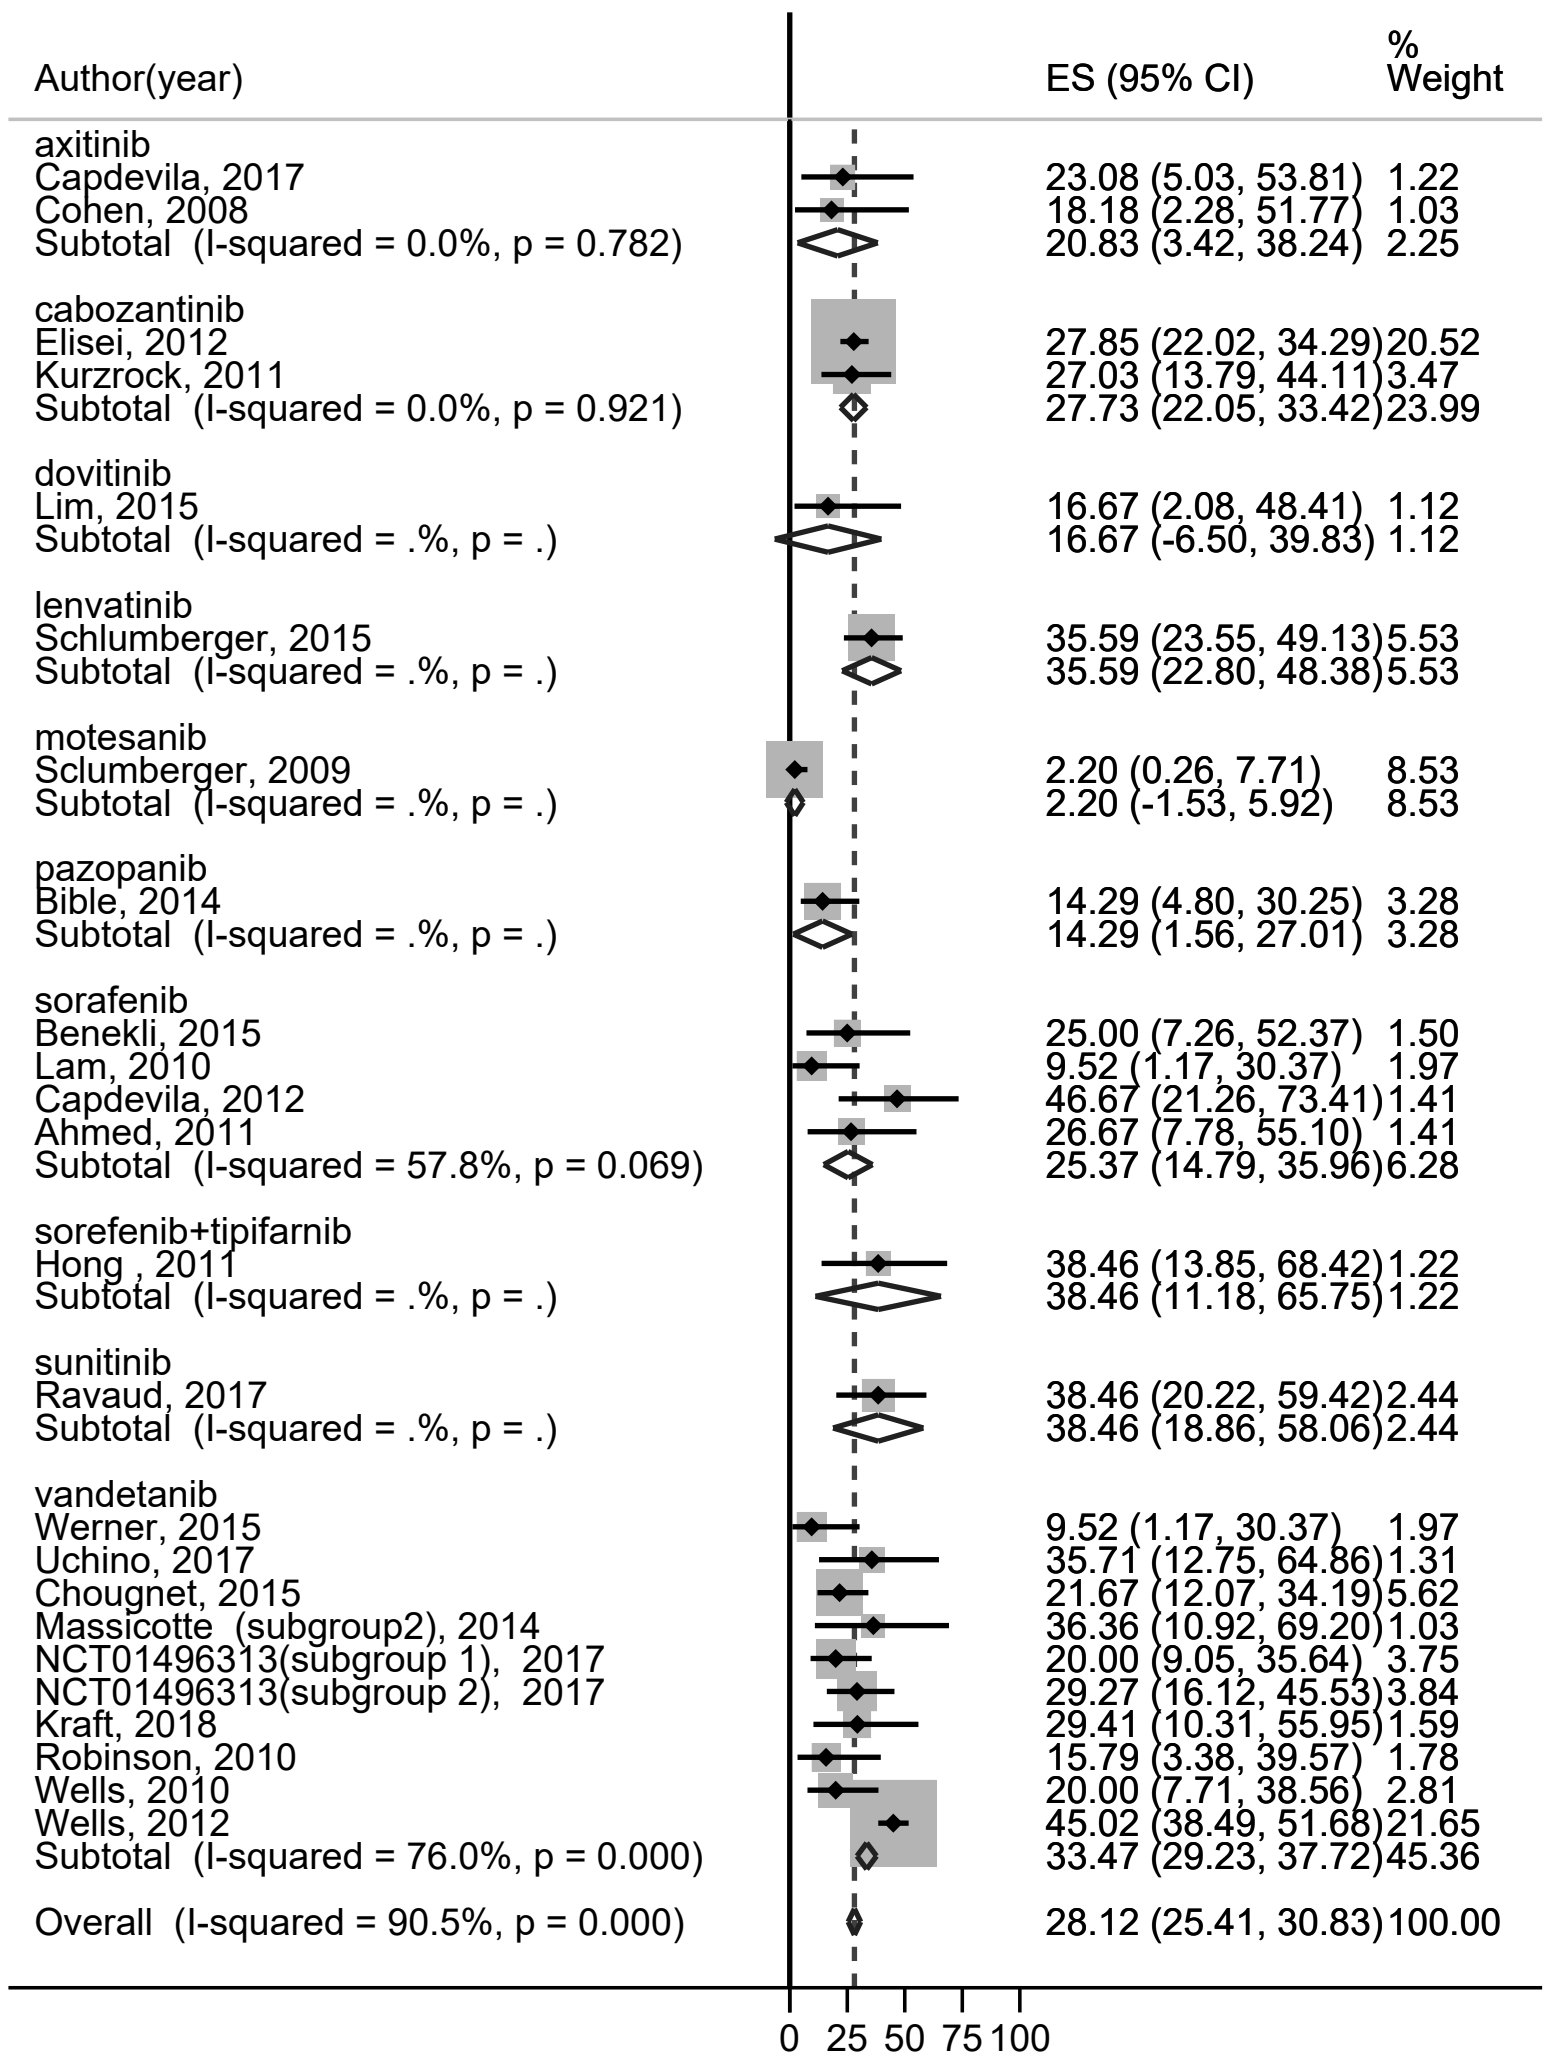

Supplement figure 7. Proportion of patients with Objective Response in MTC studies with more than 10 patients. OR was documented in 28.1% of the patients [95%CI 25.4 – 30.8; Q=241.1, X<sup>2</sup>(d.f. 23), I<sup>2</sup>=90.5%; test for overall effect z=20.3, p<0.001]
