# Supplementary material
Source: publisher figshare collection journal article supplement (https://karger.figshare.com/articles/dataset/_/12941660)
Supplement: Supplementary file 2 [file 1]

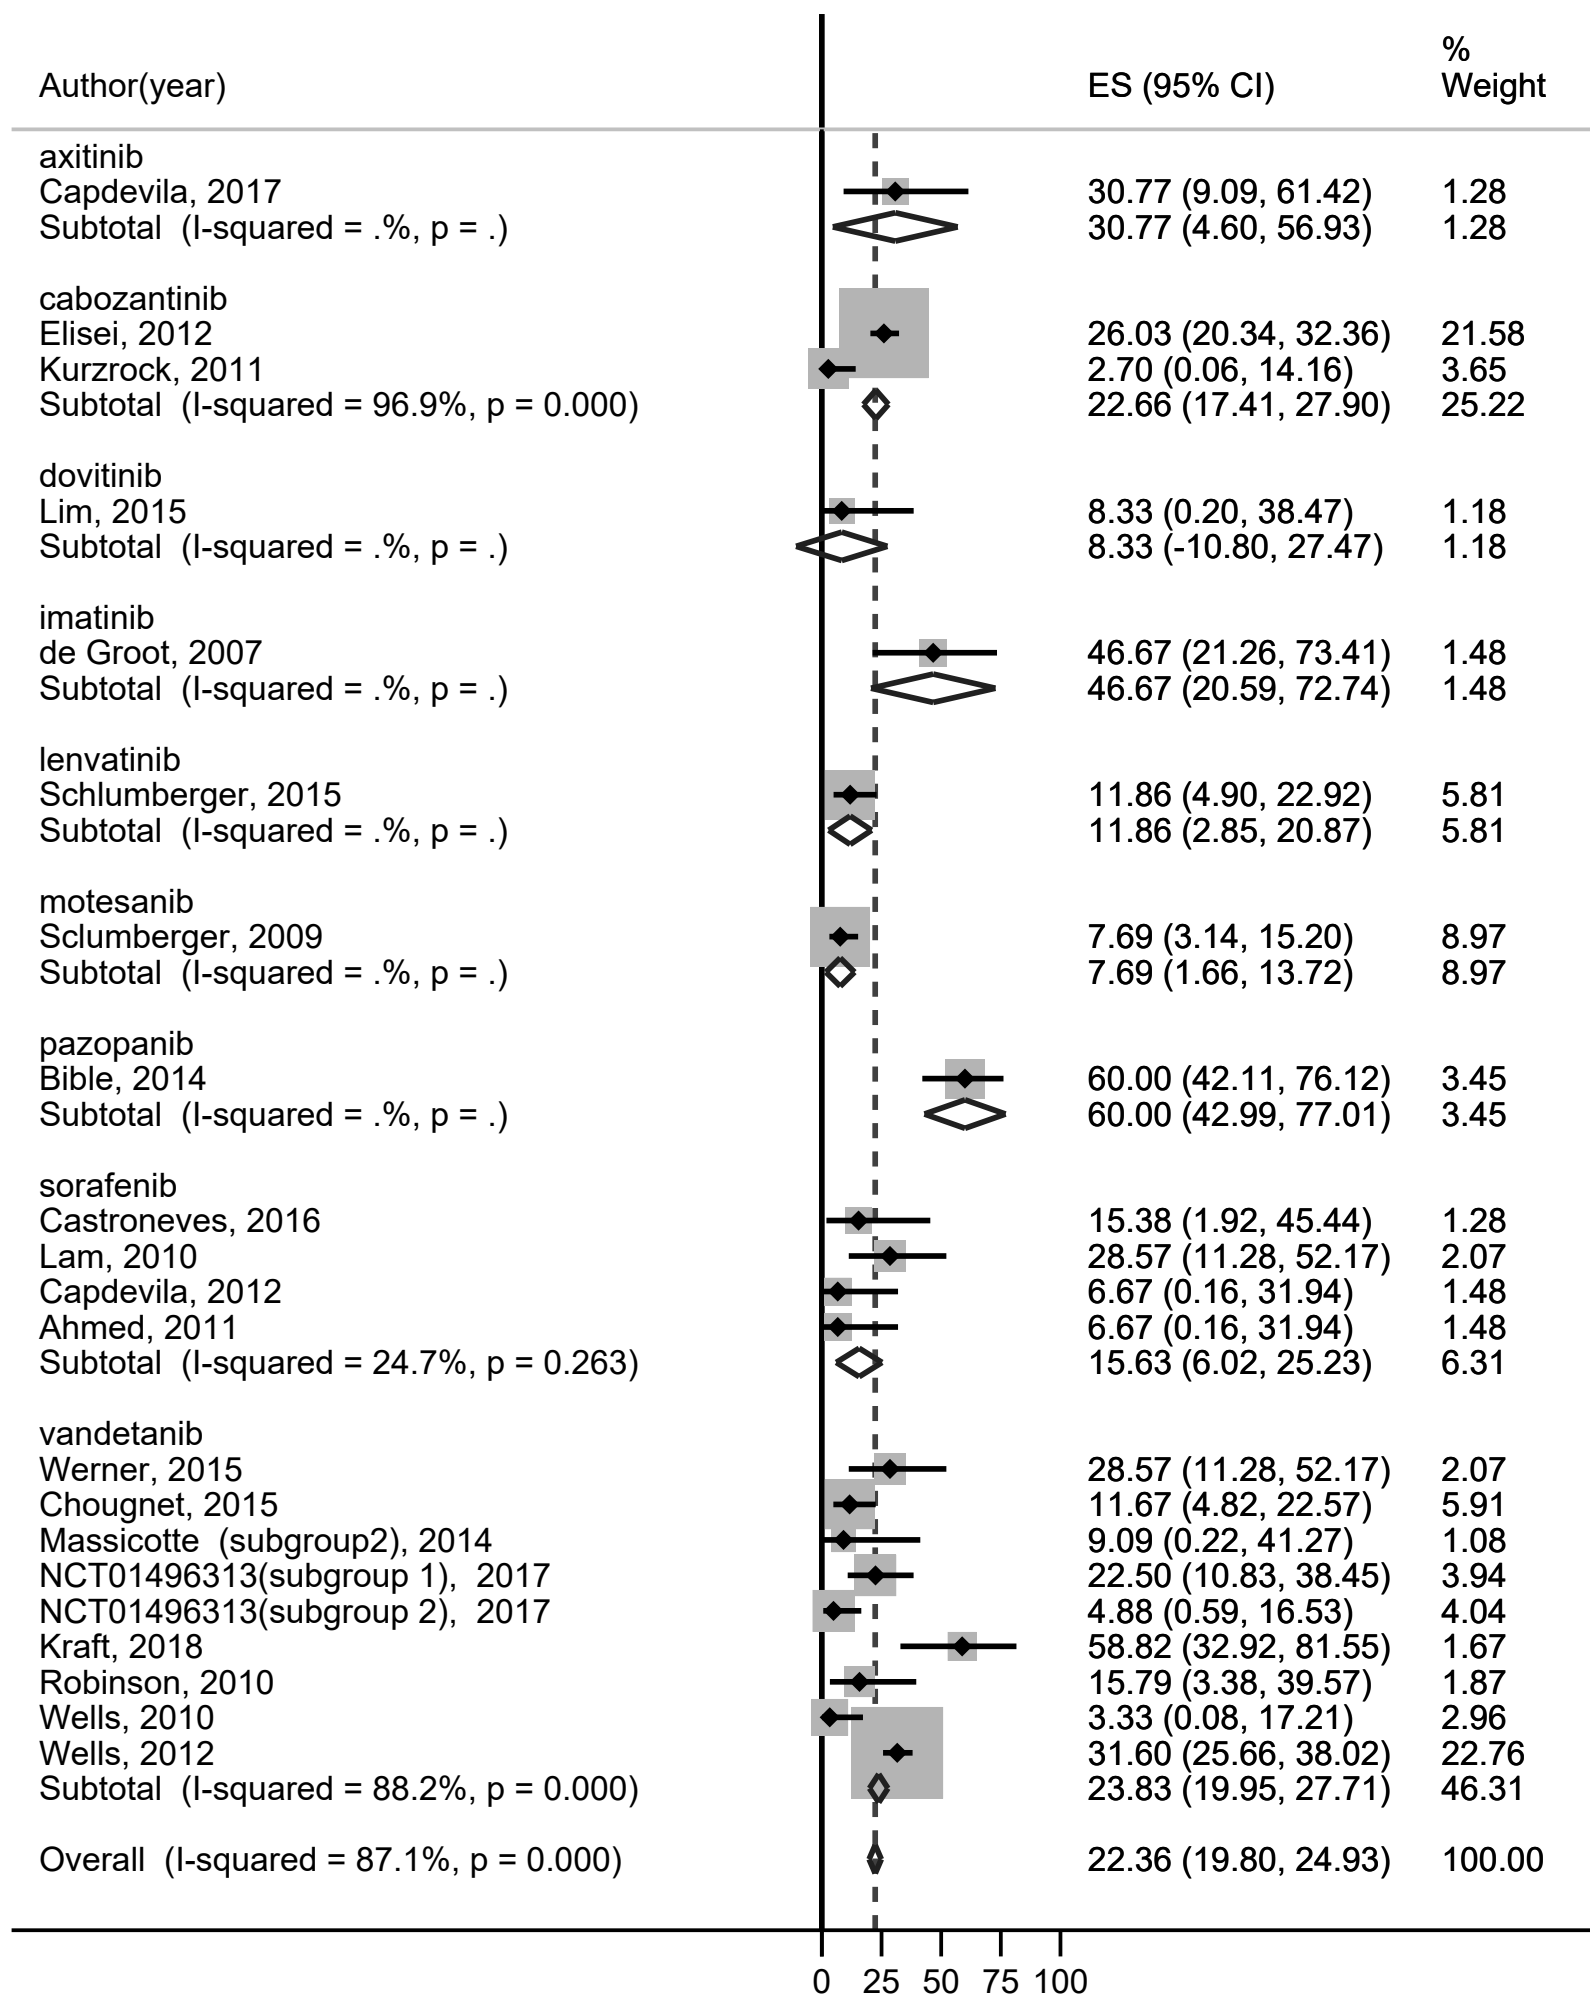

Supplement figure 9. Proportion of patients with Disease Progression (DP) in MTC studies with more than 10 patients. DP was documented in 22.4% of patients [95%CI 19.8-24.9; Q=154.9, X2(d.f. 20), I2=87.1%; z=17.1, p<0.001]
