# Supplementary material
Source: publisher figshare collection journal article supplement (https://karger.figshare.com/articles/dataset/_/12941660)
Supplement: Supplementary file 3 [file 1]

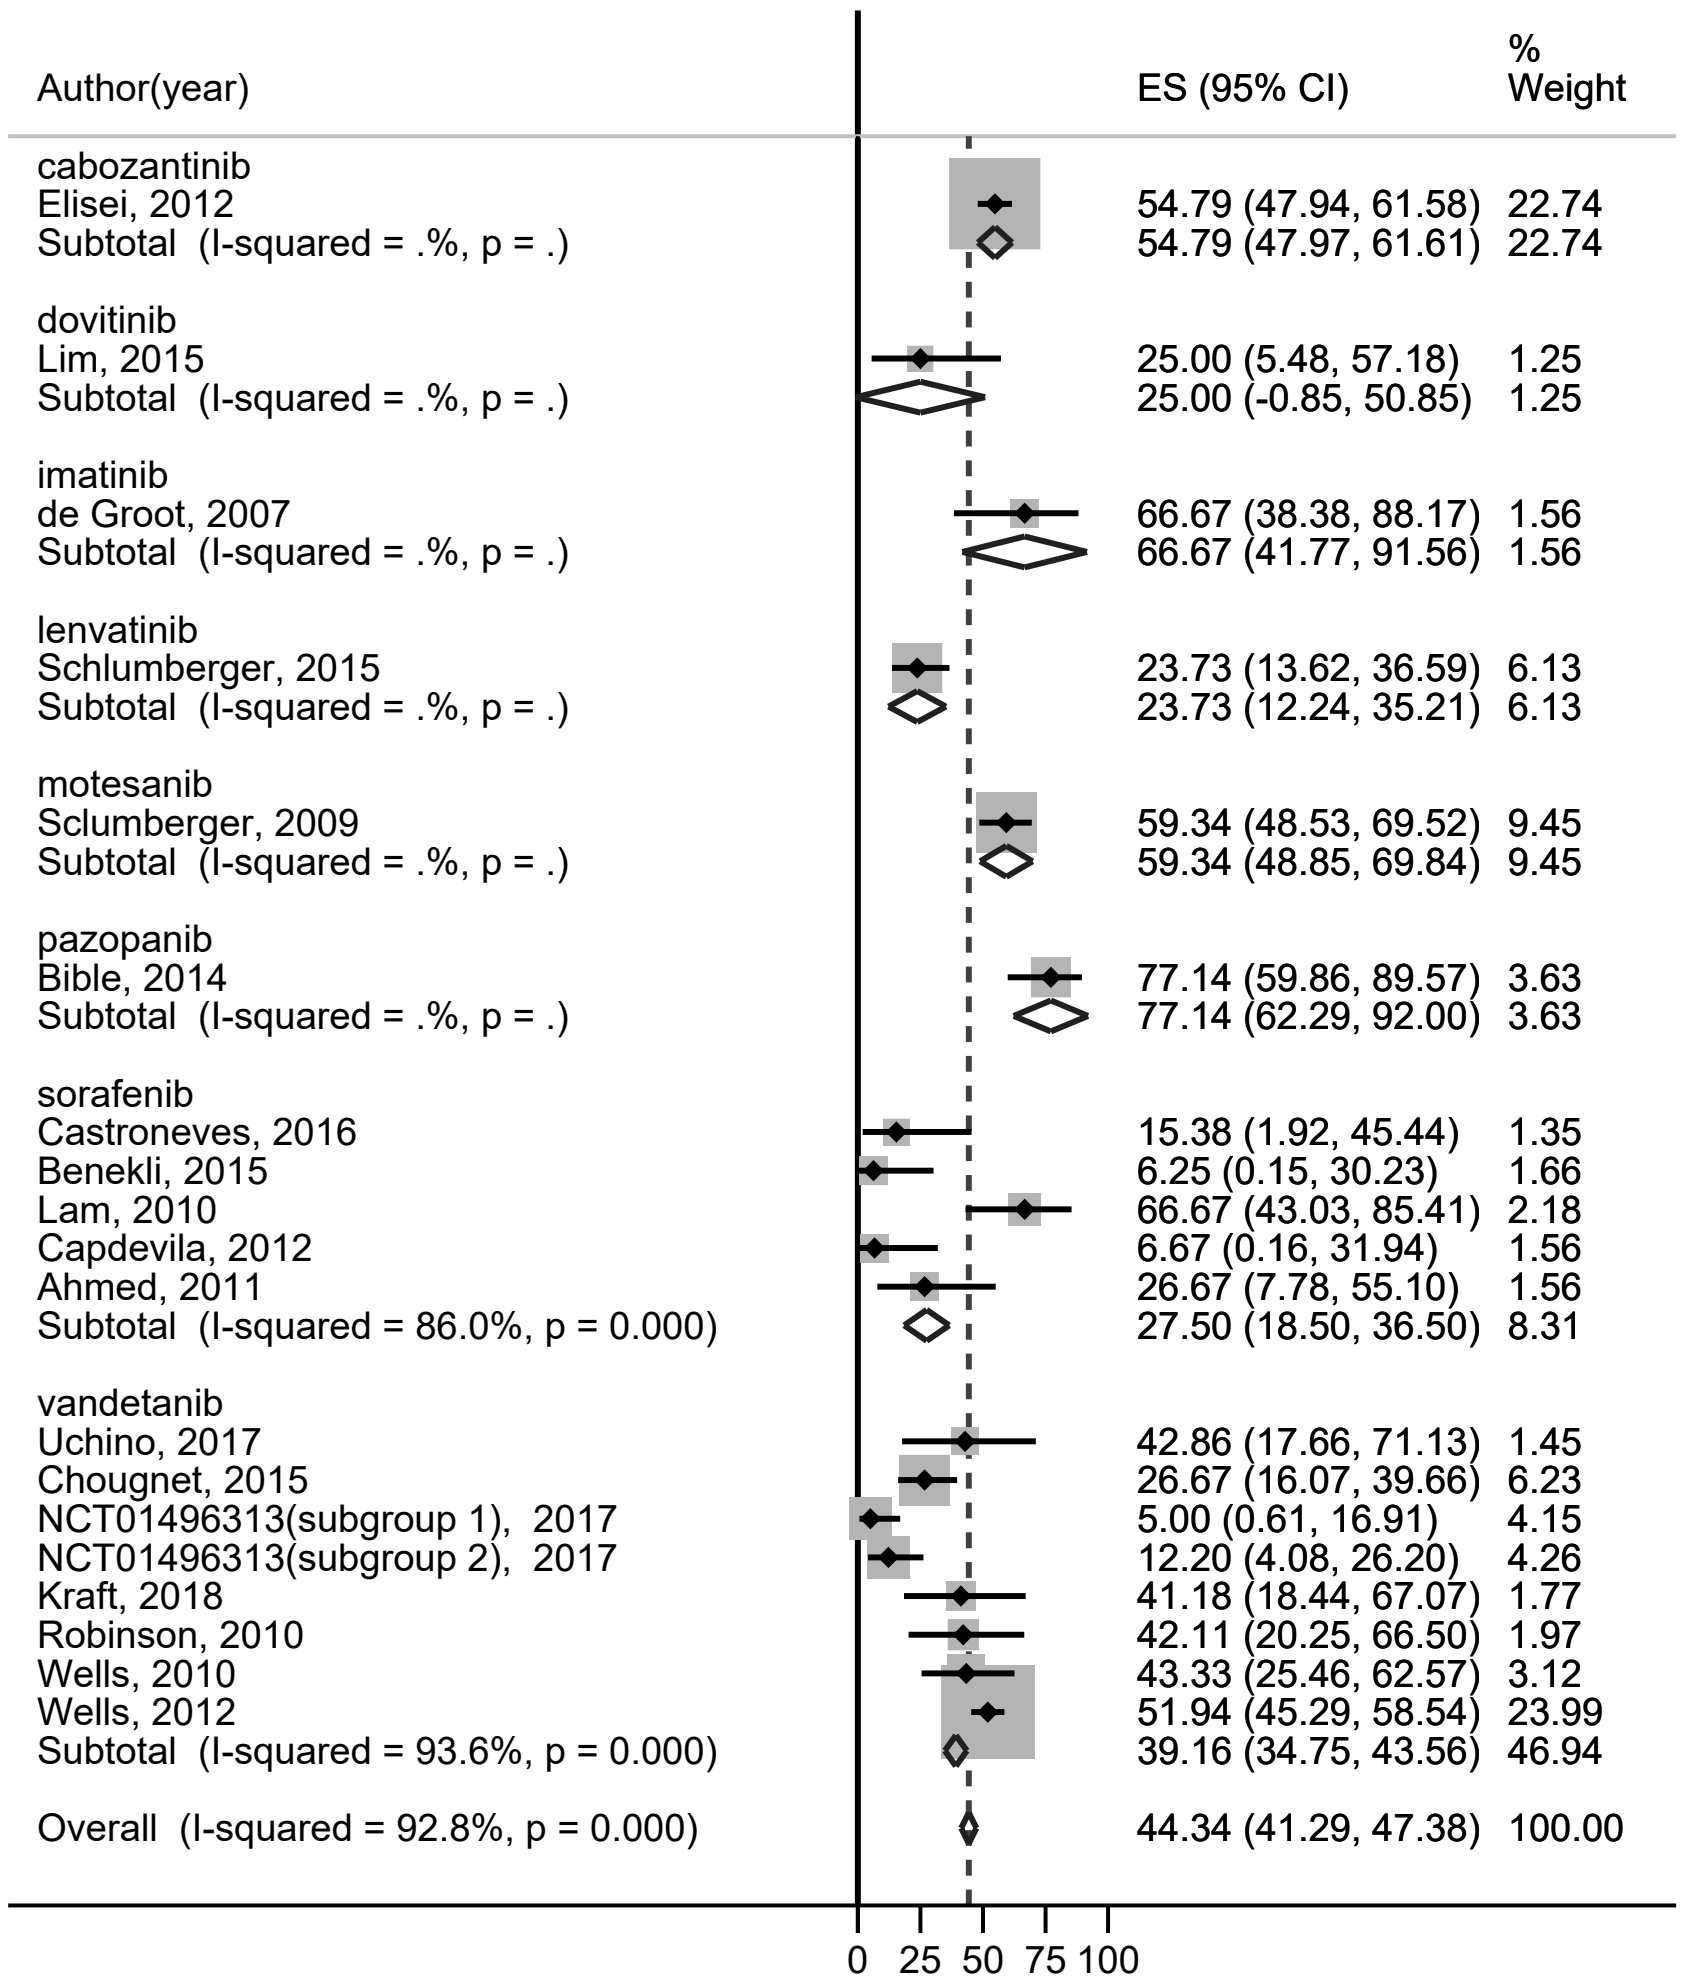

Supplement figure 10. Proportion of patients with Drug Discontinuation (DD) in MTC studies with more than 10 patients. Overall 44.3% (95%CI 41.3 – 47.4; Q=248.4, X<sup>2</sup>(d.f. 18), I<sup>2</sup>=92.8%) of patients discontinued the drug (z=28.5, p<0.001)
