# Supplementary material
Source: publisher figshare collection journal article supplement (https://karger.figshare.com/articles/dataset/_/12941660)
Supplement: Supplementary file 4 [file 1]

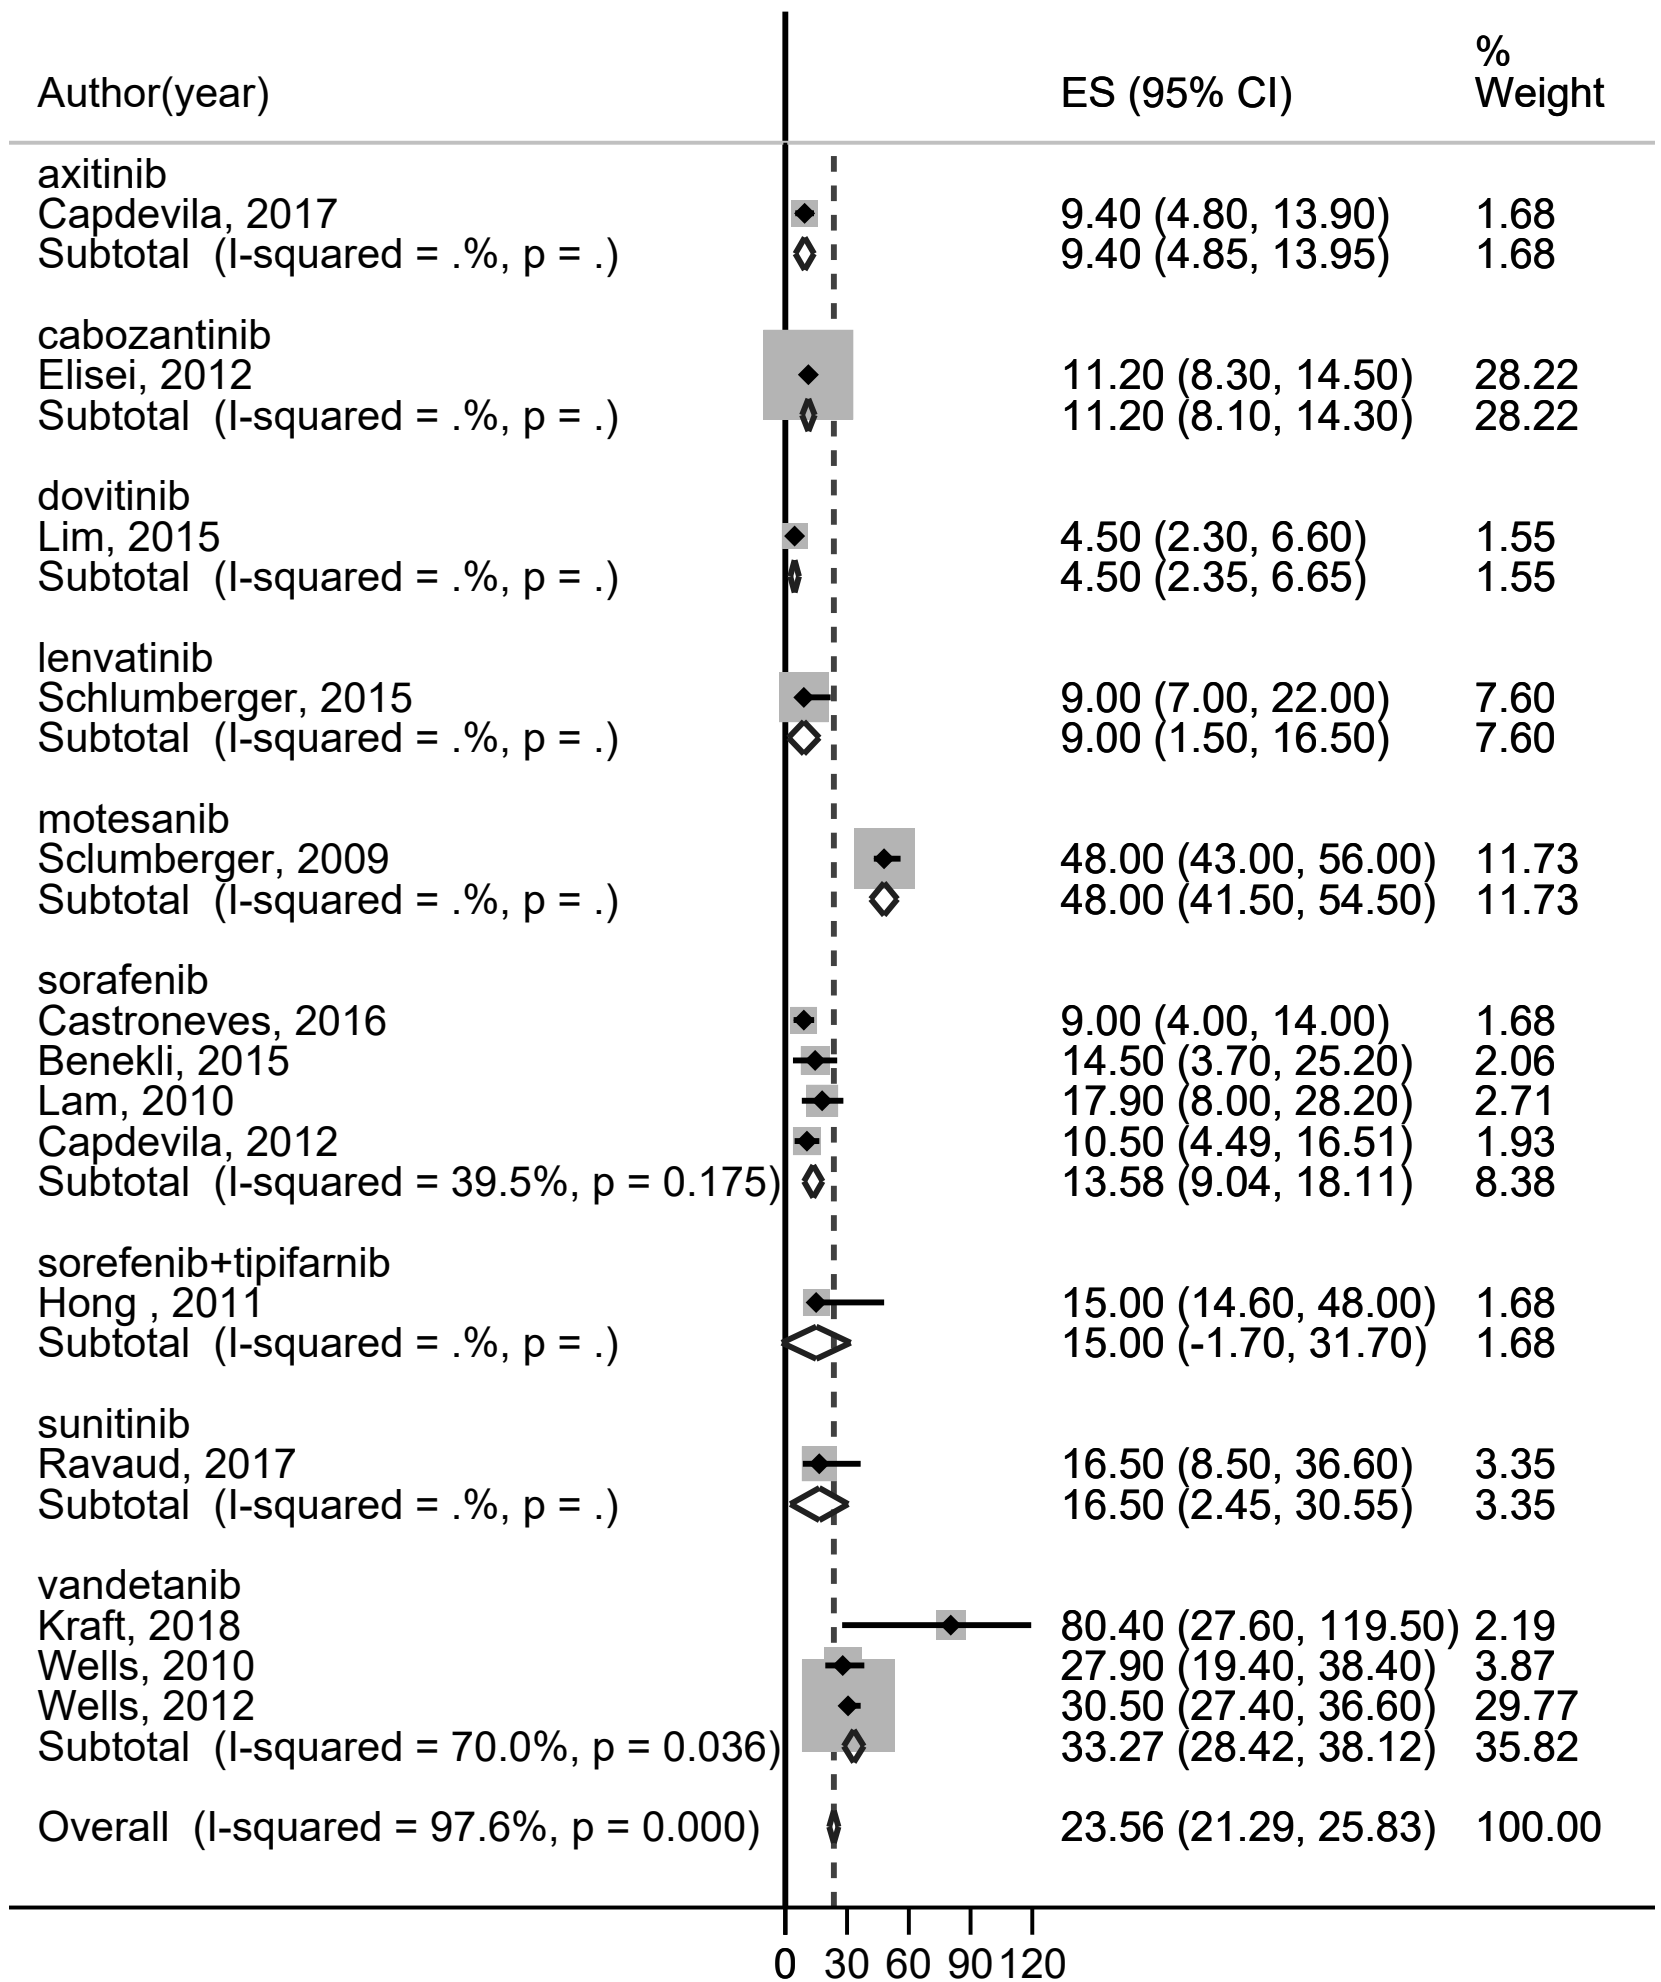

Supplement figure 12. Median Progression Free Survival (months) (PFS) in MTC studies with more than 10 patients. PFS was 23.5 months [95%CI 21.3 – 25.8; Q=634, X2(d.f. 13), p<0.001, I2=97.6%; z=20.4, p<0.001]
