# Supplementary material
Source: publisher figshare collection journal article supplement (https://karger.figshare.com/articles/dataset/_/12941660)
Supplement: Supplementary file 5 [file 1]

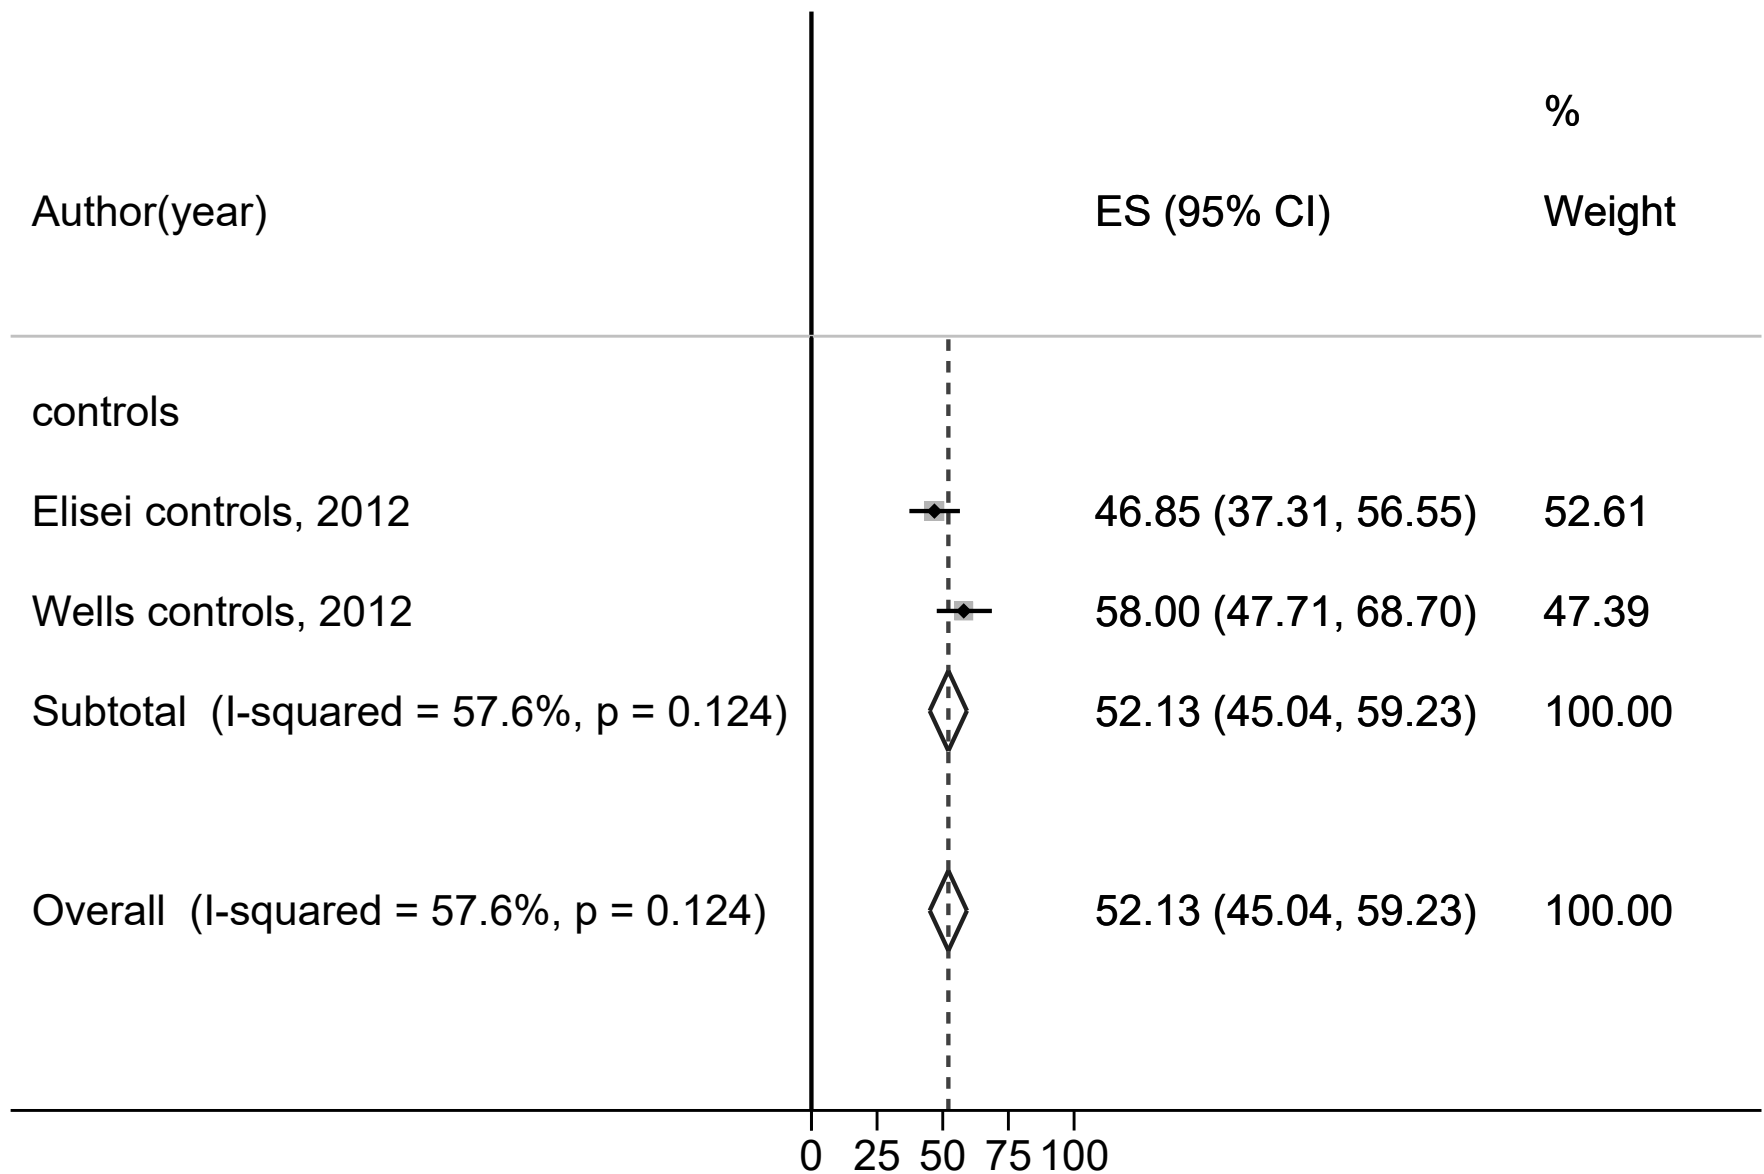

Supplement figure 2. Proportion of controls with Stable Disease (SD).

SD in MTC control patients was reported in 52.1% of patients [95%CI 45.03 – 59.2; Q=52.1, X<sup>2</sup>(d.f. 1), I<sup>2</sup>=57.6%, p=0.124; test for overall effect z=2.36, p<0.001]
