# Supplementary material
Source: publisher figshare collection journal article supplement (https://karger.figshare.com/articles/dataset/_/12941660)
Supplement: Supplementary file 6 [file 1]

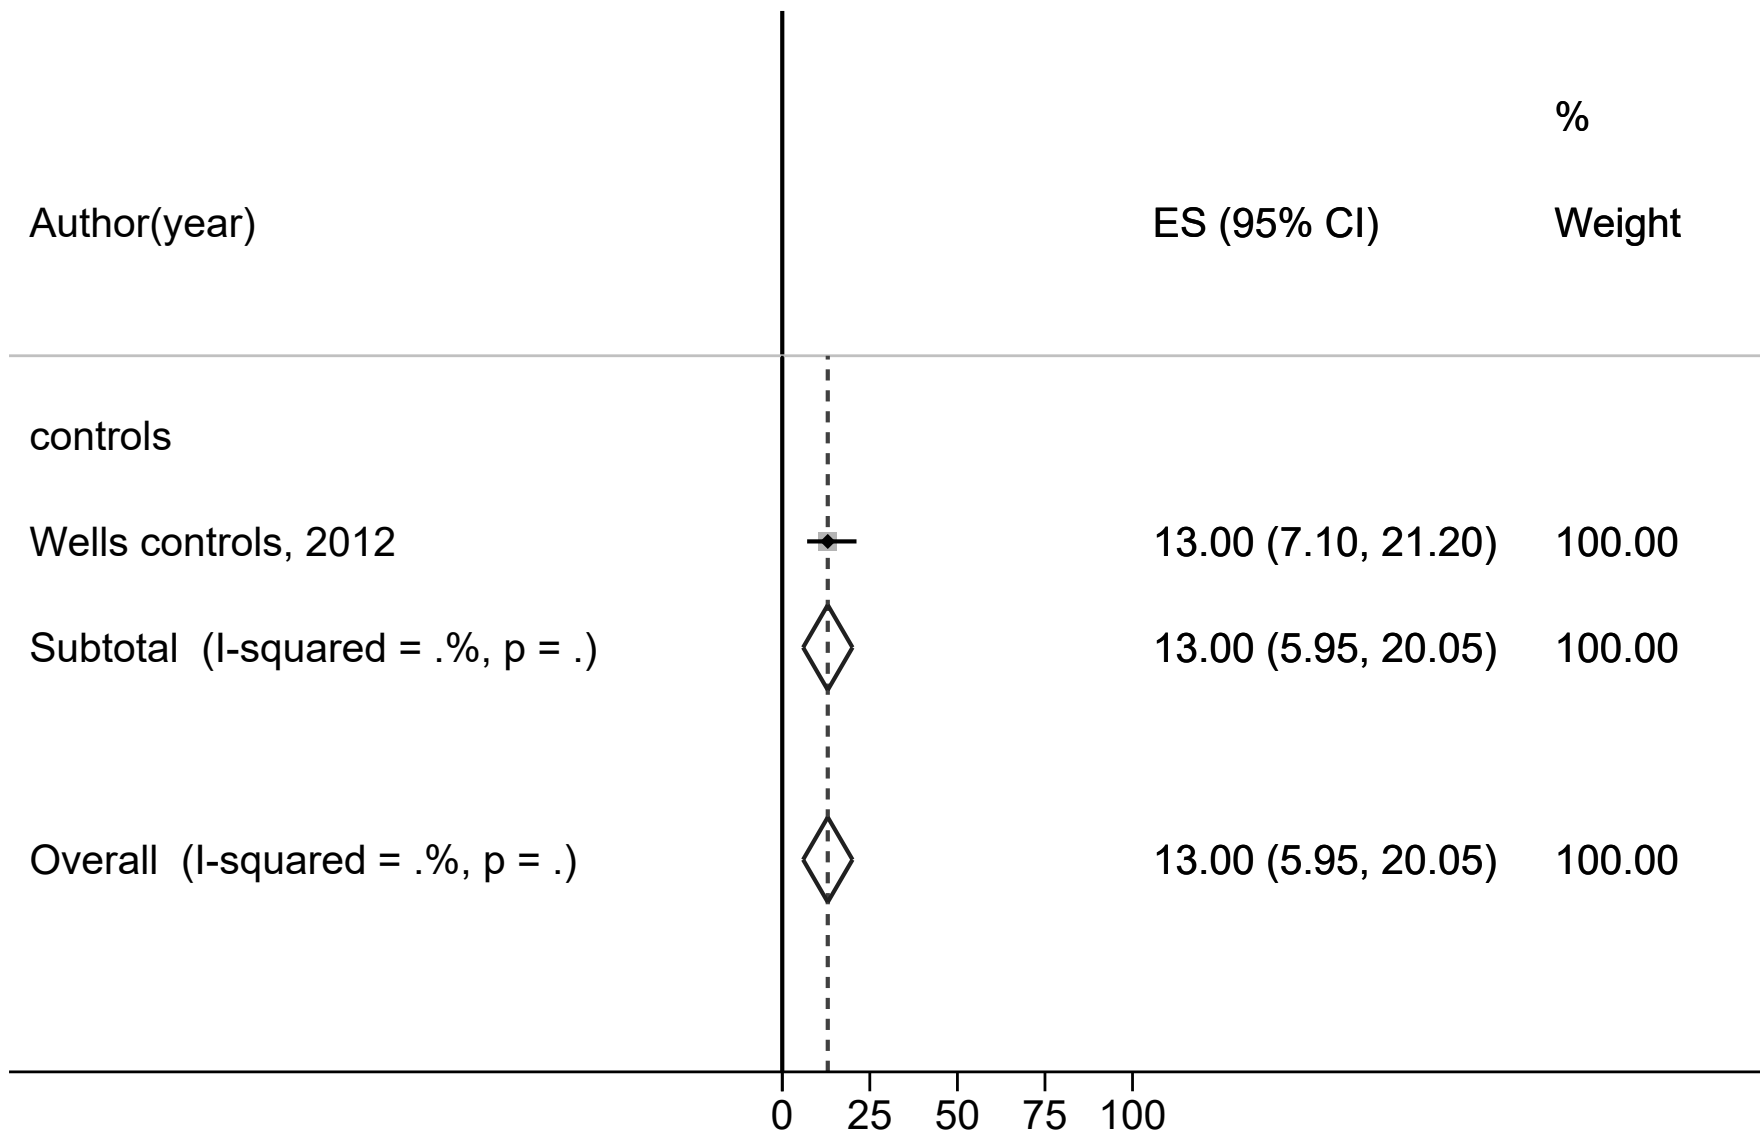

Supplement figure 1. Proportion of controls with Objective Response (OR)  
 OR in MTC control patients was documented in 13% of the patients [95%CI 5.95 – 20.05;  
 test for overall effect  $z=3.613$ ,  $p<0.001$ ]
