# Supplementary material
Source: publisher figshare collection journal article supplement (https://karger.figshare.com/articles/dataset/_/12941660)
Supplement: Supplementary file 7 [file 1]

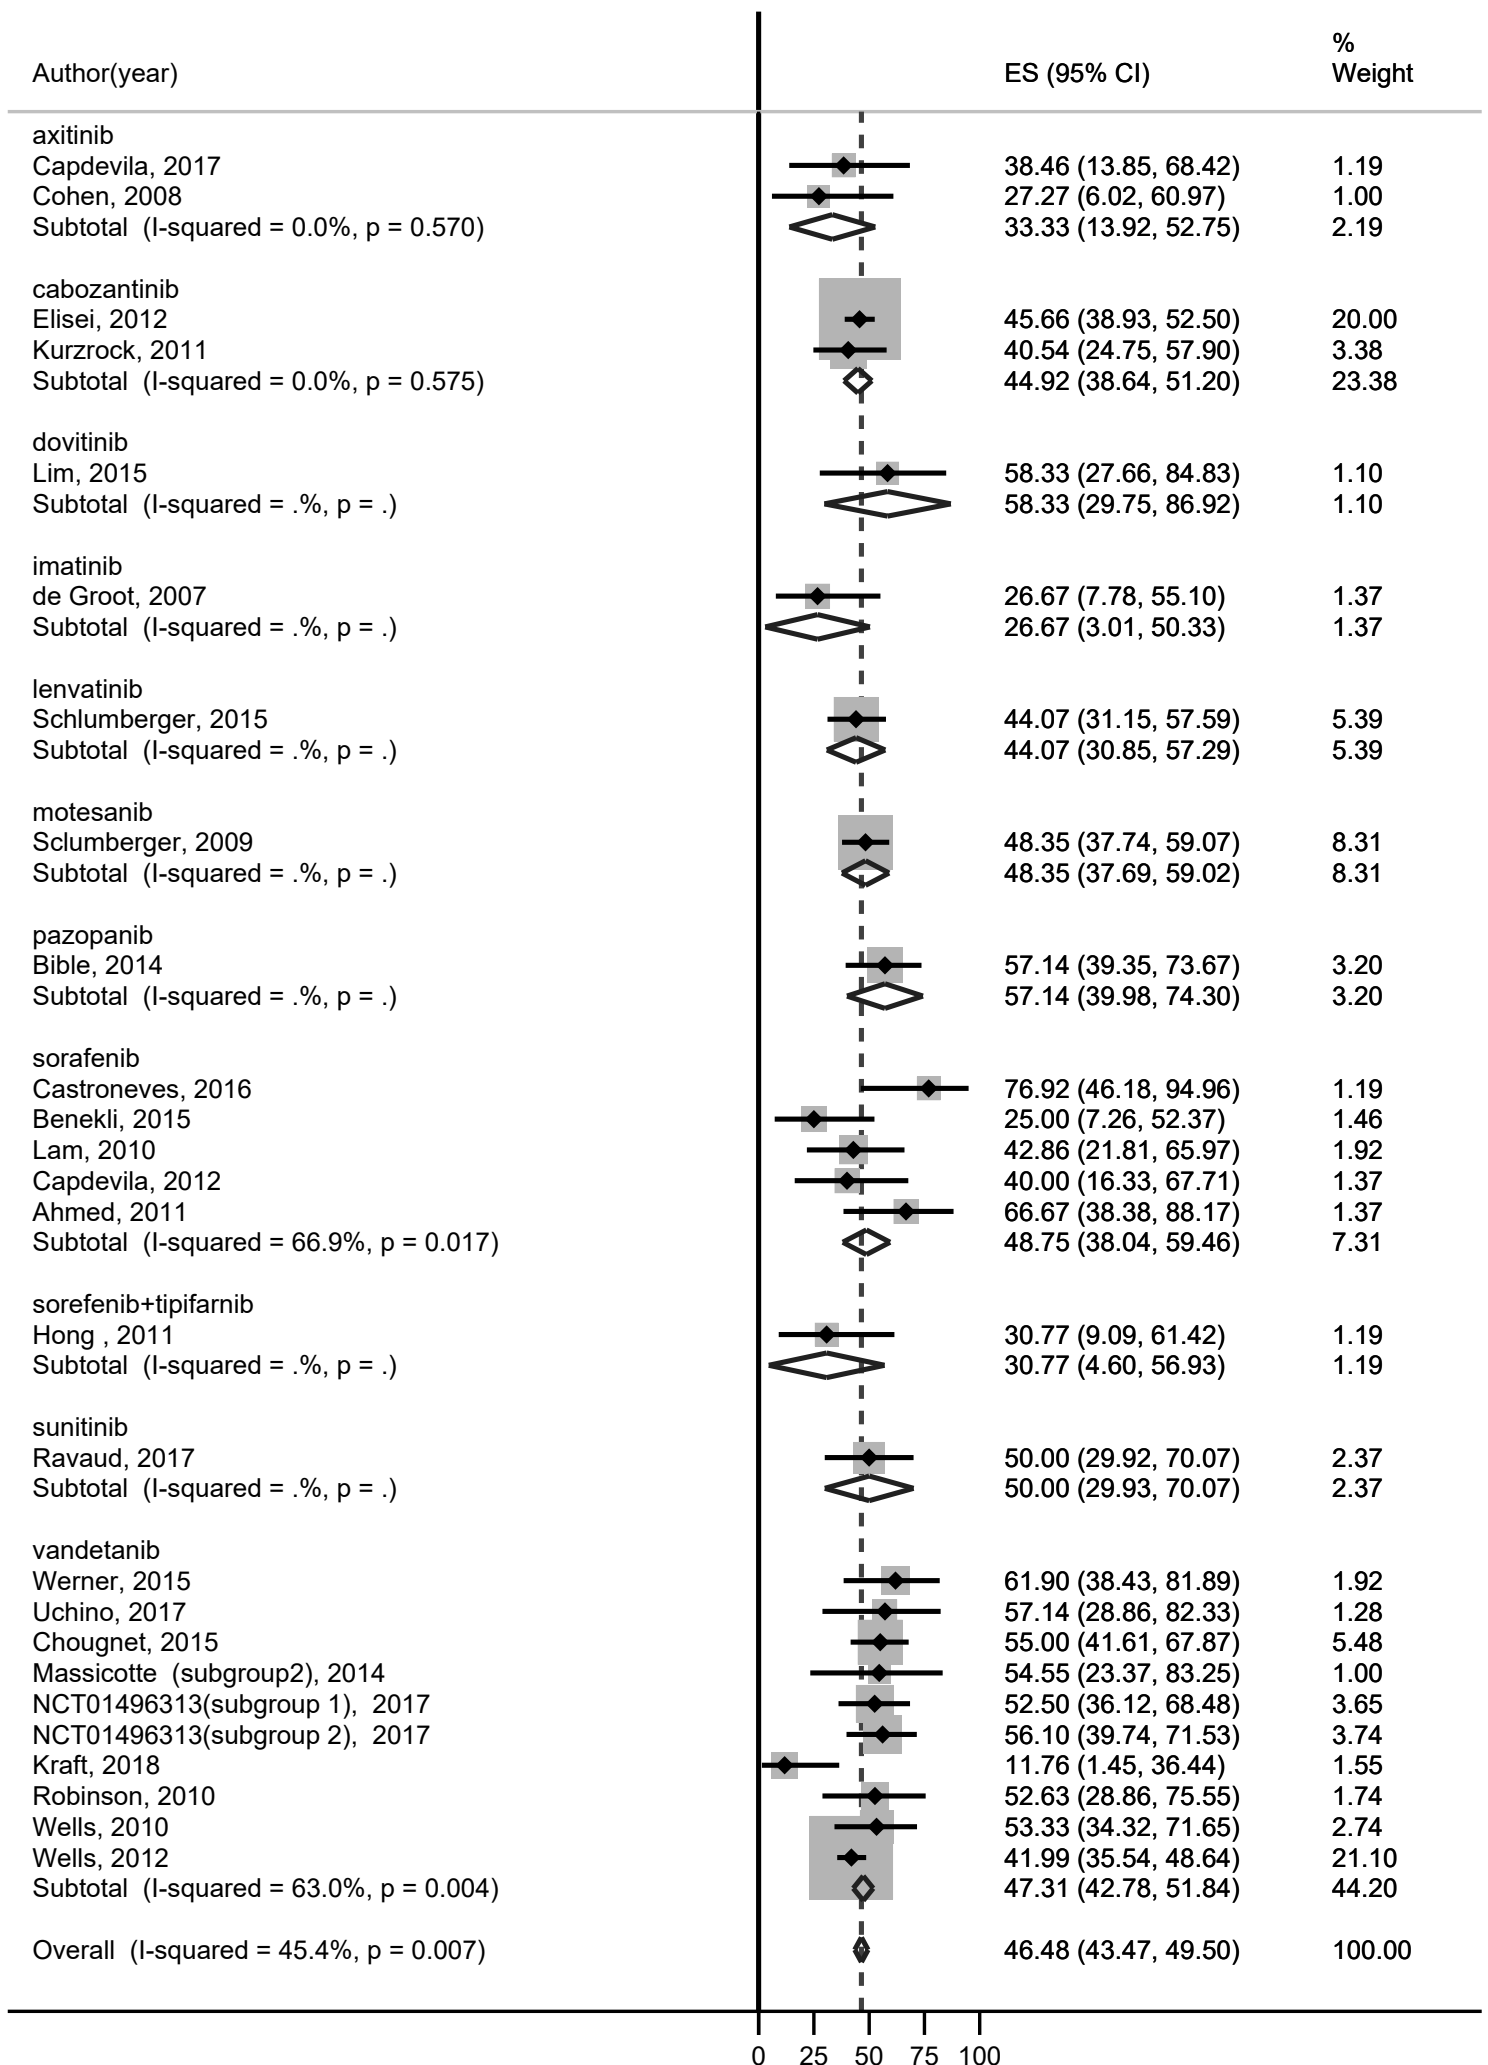

Supplement figure 8. Proportion of patients with Stable Disease (SD) in MTC studies with more than 10 patients. SD was reported in 46.5% of patients [95%CI 43.5 – 49.4; Q=45.8, X2(d.f. 25), I2=45.4%; test for overall effect z=30.2, p<0.001]
