# Supplementary material
Source: publisher figshare collection journal article supplement (https://karger.figshare.com/articles/dataset/_/12941660)
Supplement: Supplementary file 8 [file 1]

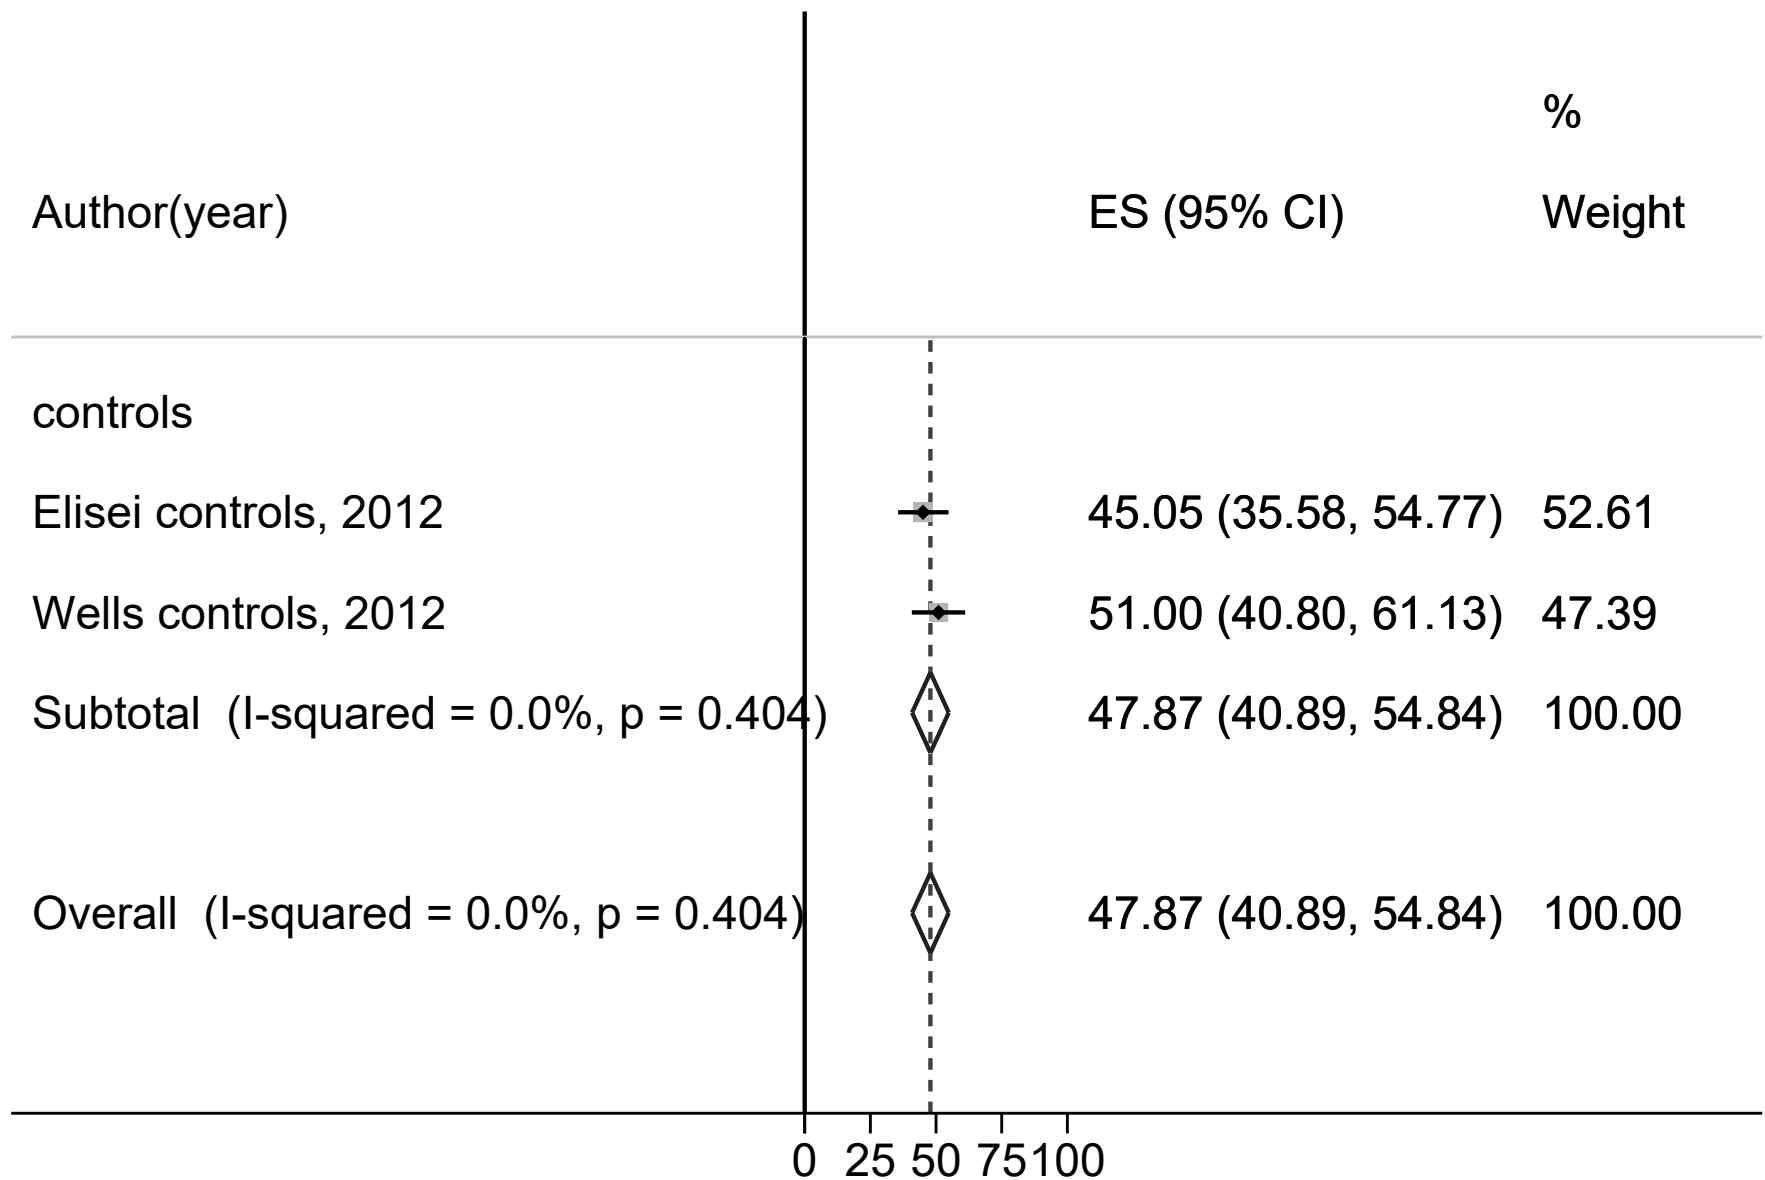

Supplement figure 3. Proportion of controls with Disease Progression (DP).

DP in MTC control patients was documented in 47.87% of patients [95%CI 40.9-54.8; Q=0.7, X<sup>2</sup>(d.f. 1), I<sup>2</sup>=0%, p=0.4; z=13.4, p<0.001]
