# Supplementary material
Source: publisher figshare collection journal article supplement (https://karger.figshare.com/articles/dataset/_/12941660)
Supplement: Supplementary file 9 [file 1]

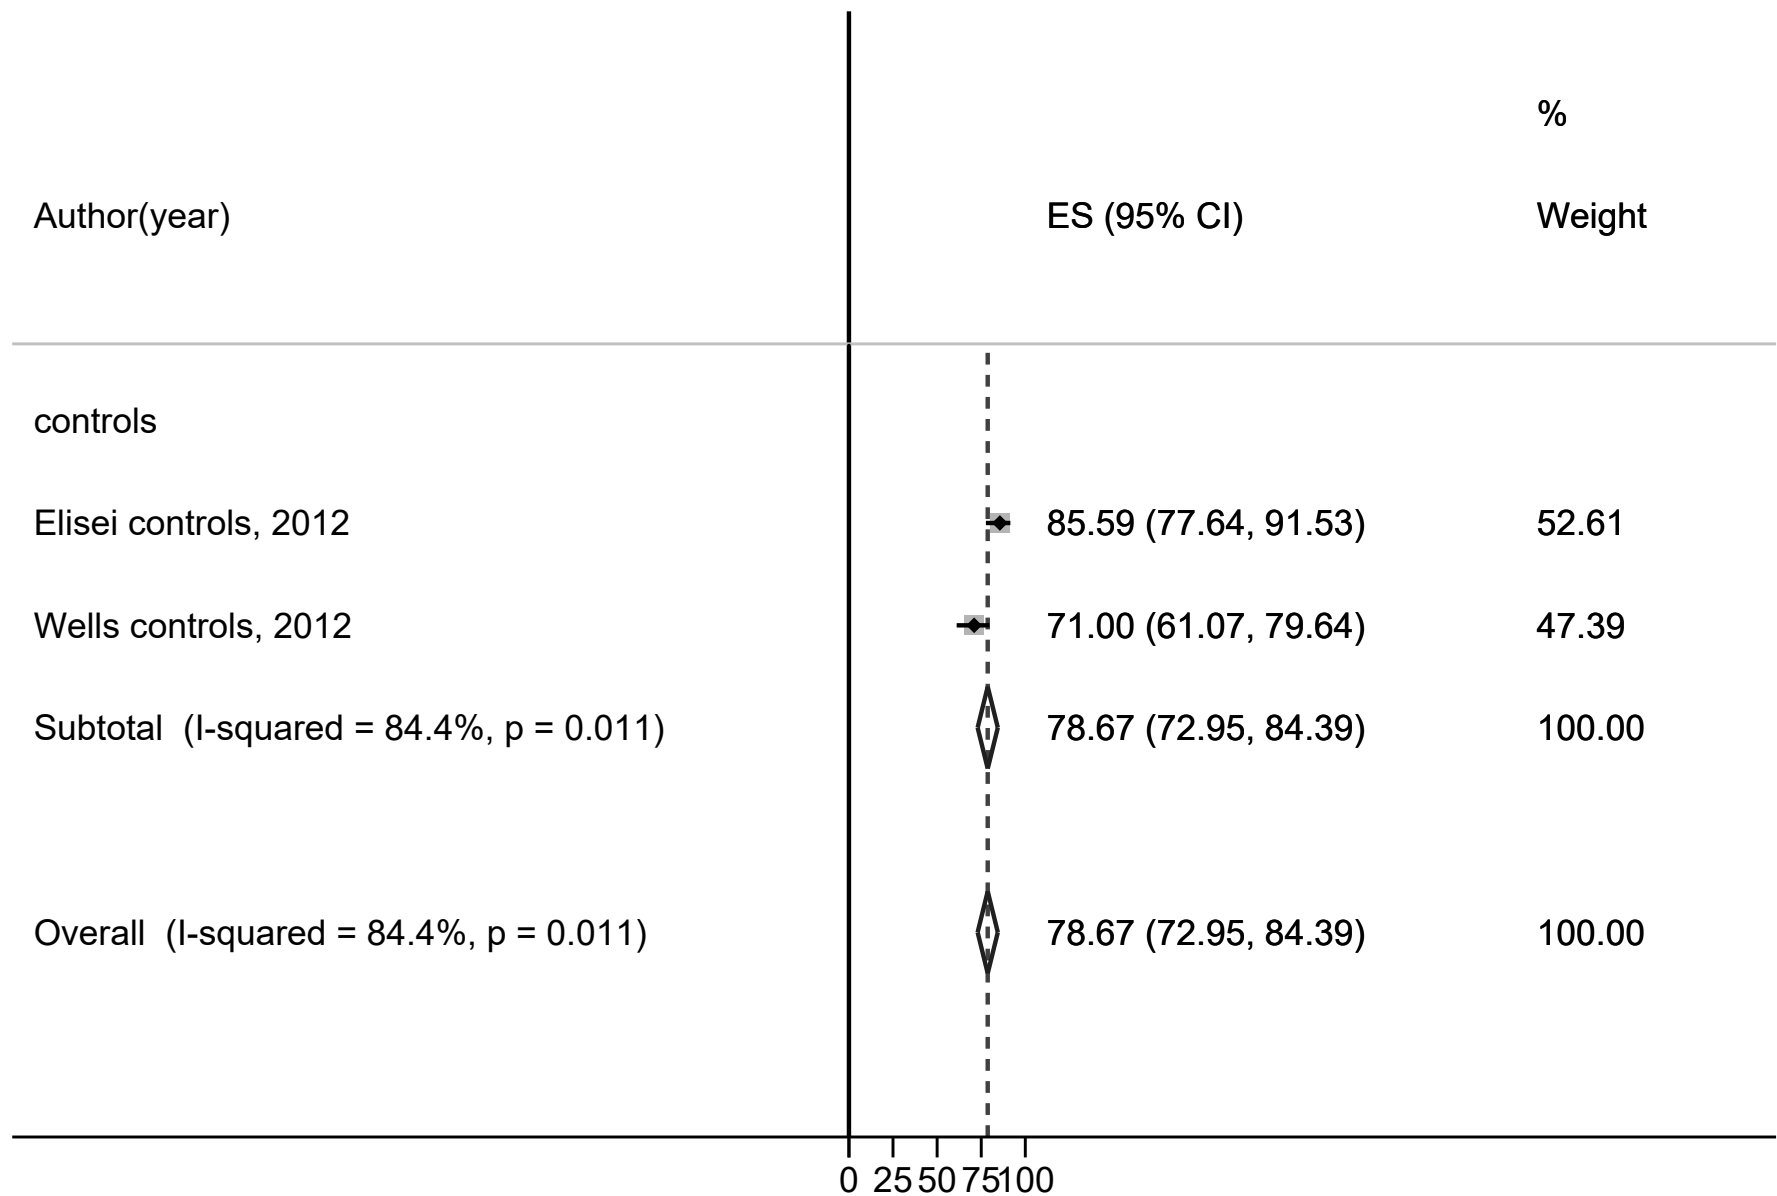

Supplement figure 4. Proportion of controls with Drug Discontinuation (DD).

Overall 78.6% (95%CI 72.9 – 84.3; Q=6.43, X<sup>2</sup>(d.f. 1), I<sup>2</sup>=84.4%, p=0.011) of MTC control patients discontinued the drug (z=26.9, p<0.001)
