# Supplementary material
Source: publisher figshare collection journal article supplement (https://karger.figshare.com/articles/dataset/_/12941660)
Supplement: Supplementary file 10 [file 1]

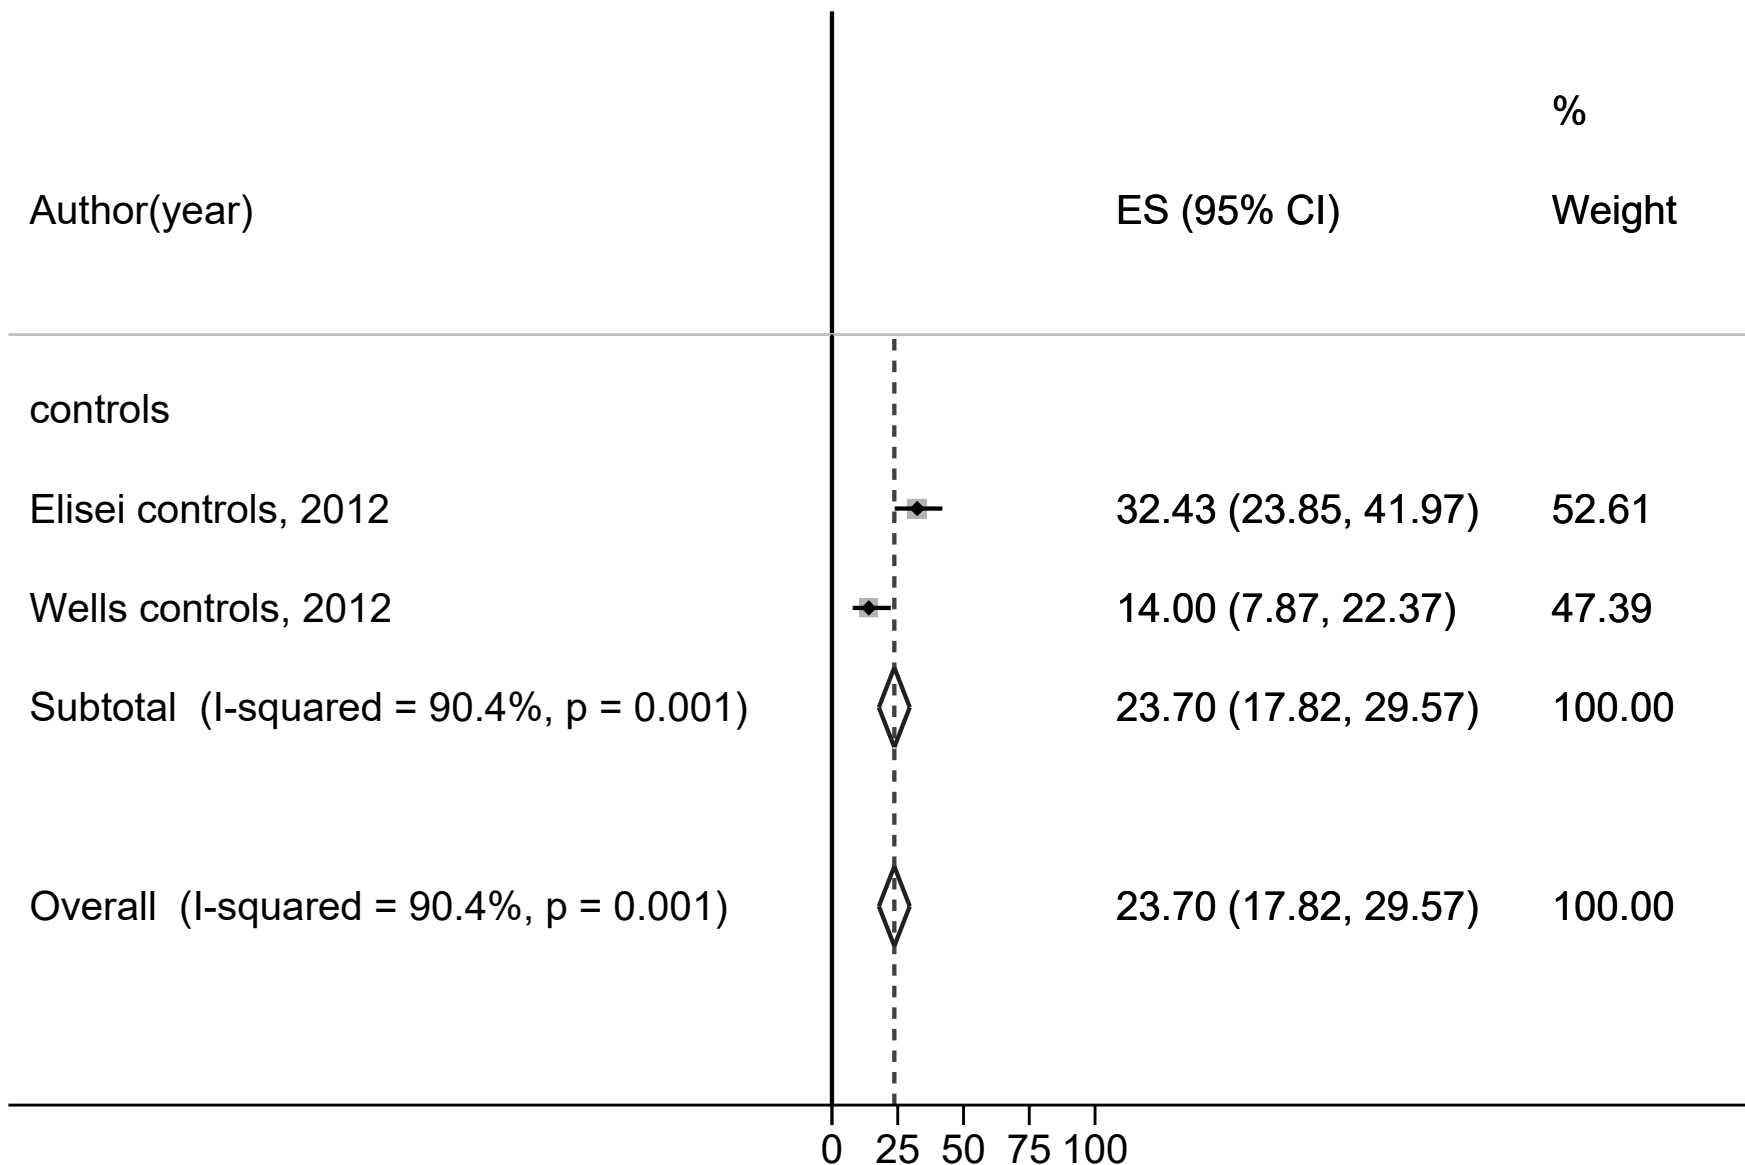

Supplement figure 5. Proportion of MTC control patients with Grade  $\geq 3$  Adverse Events (G3AEs). G3AEs were reported in 23.7% [95%CI 17.8 – 29.5;  $Q=10.4$ ,  $X^2(d.f. 1)$ ,  $p=0.001$ ,  $I^2=90.4\%$ ] of patients ( $z=7.9$ ,  $p<0.001$ )
