# Supplementary material
Source: publisher figshare collection journal article supplement (https://karger.figshare.com/articles/dataset/_/12941660)
Supplement: Supplementary file 11 [file 1]

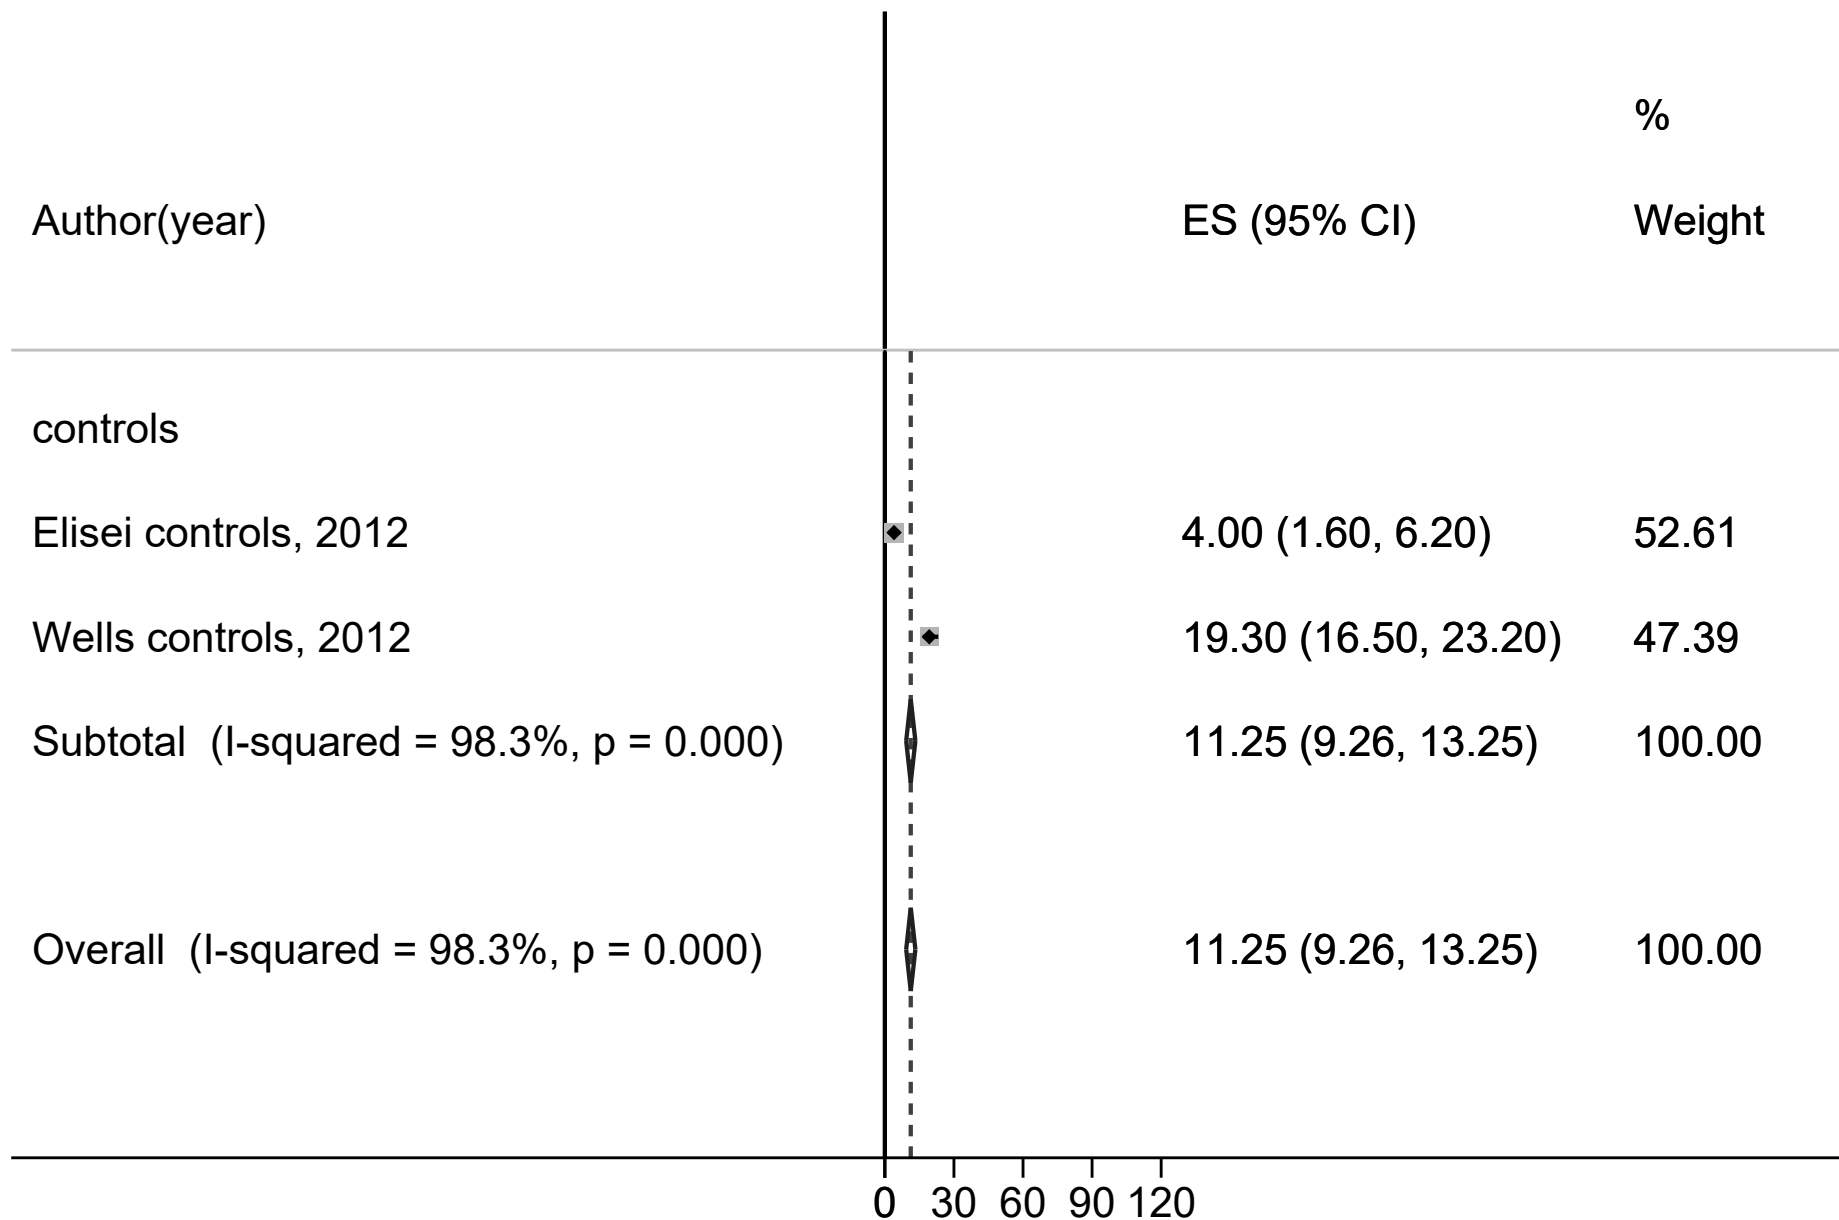

Supplement figure 6. Median Progression Free Survival (months) in MTC control patients (PFS)

PFS in this group was 11.2 months [95%CI 9.2 – 13.2; Q=60.3, X<sup>2</sup>(d.f. 1), p<0.001, I<sup>2</sup>=98.3%; z=11.05, p<0.001]
