# Supplementary material
Source: publisher figshare collection journal article supplement (https://karger.figshare.com/articles/dataset/_/12941660)
Supplement: Supplementary file 12 [file 1]

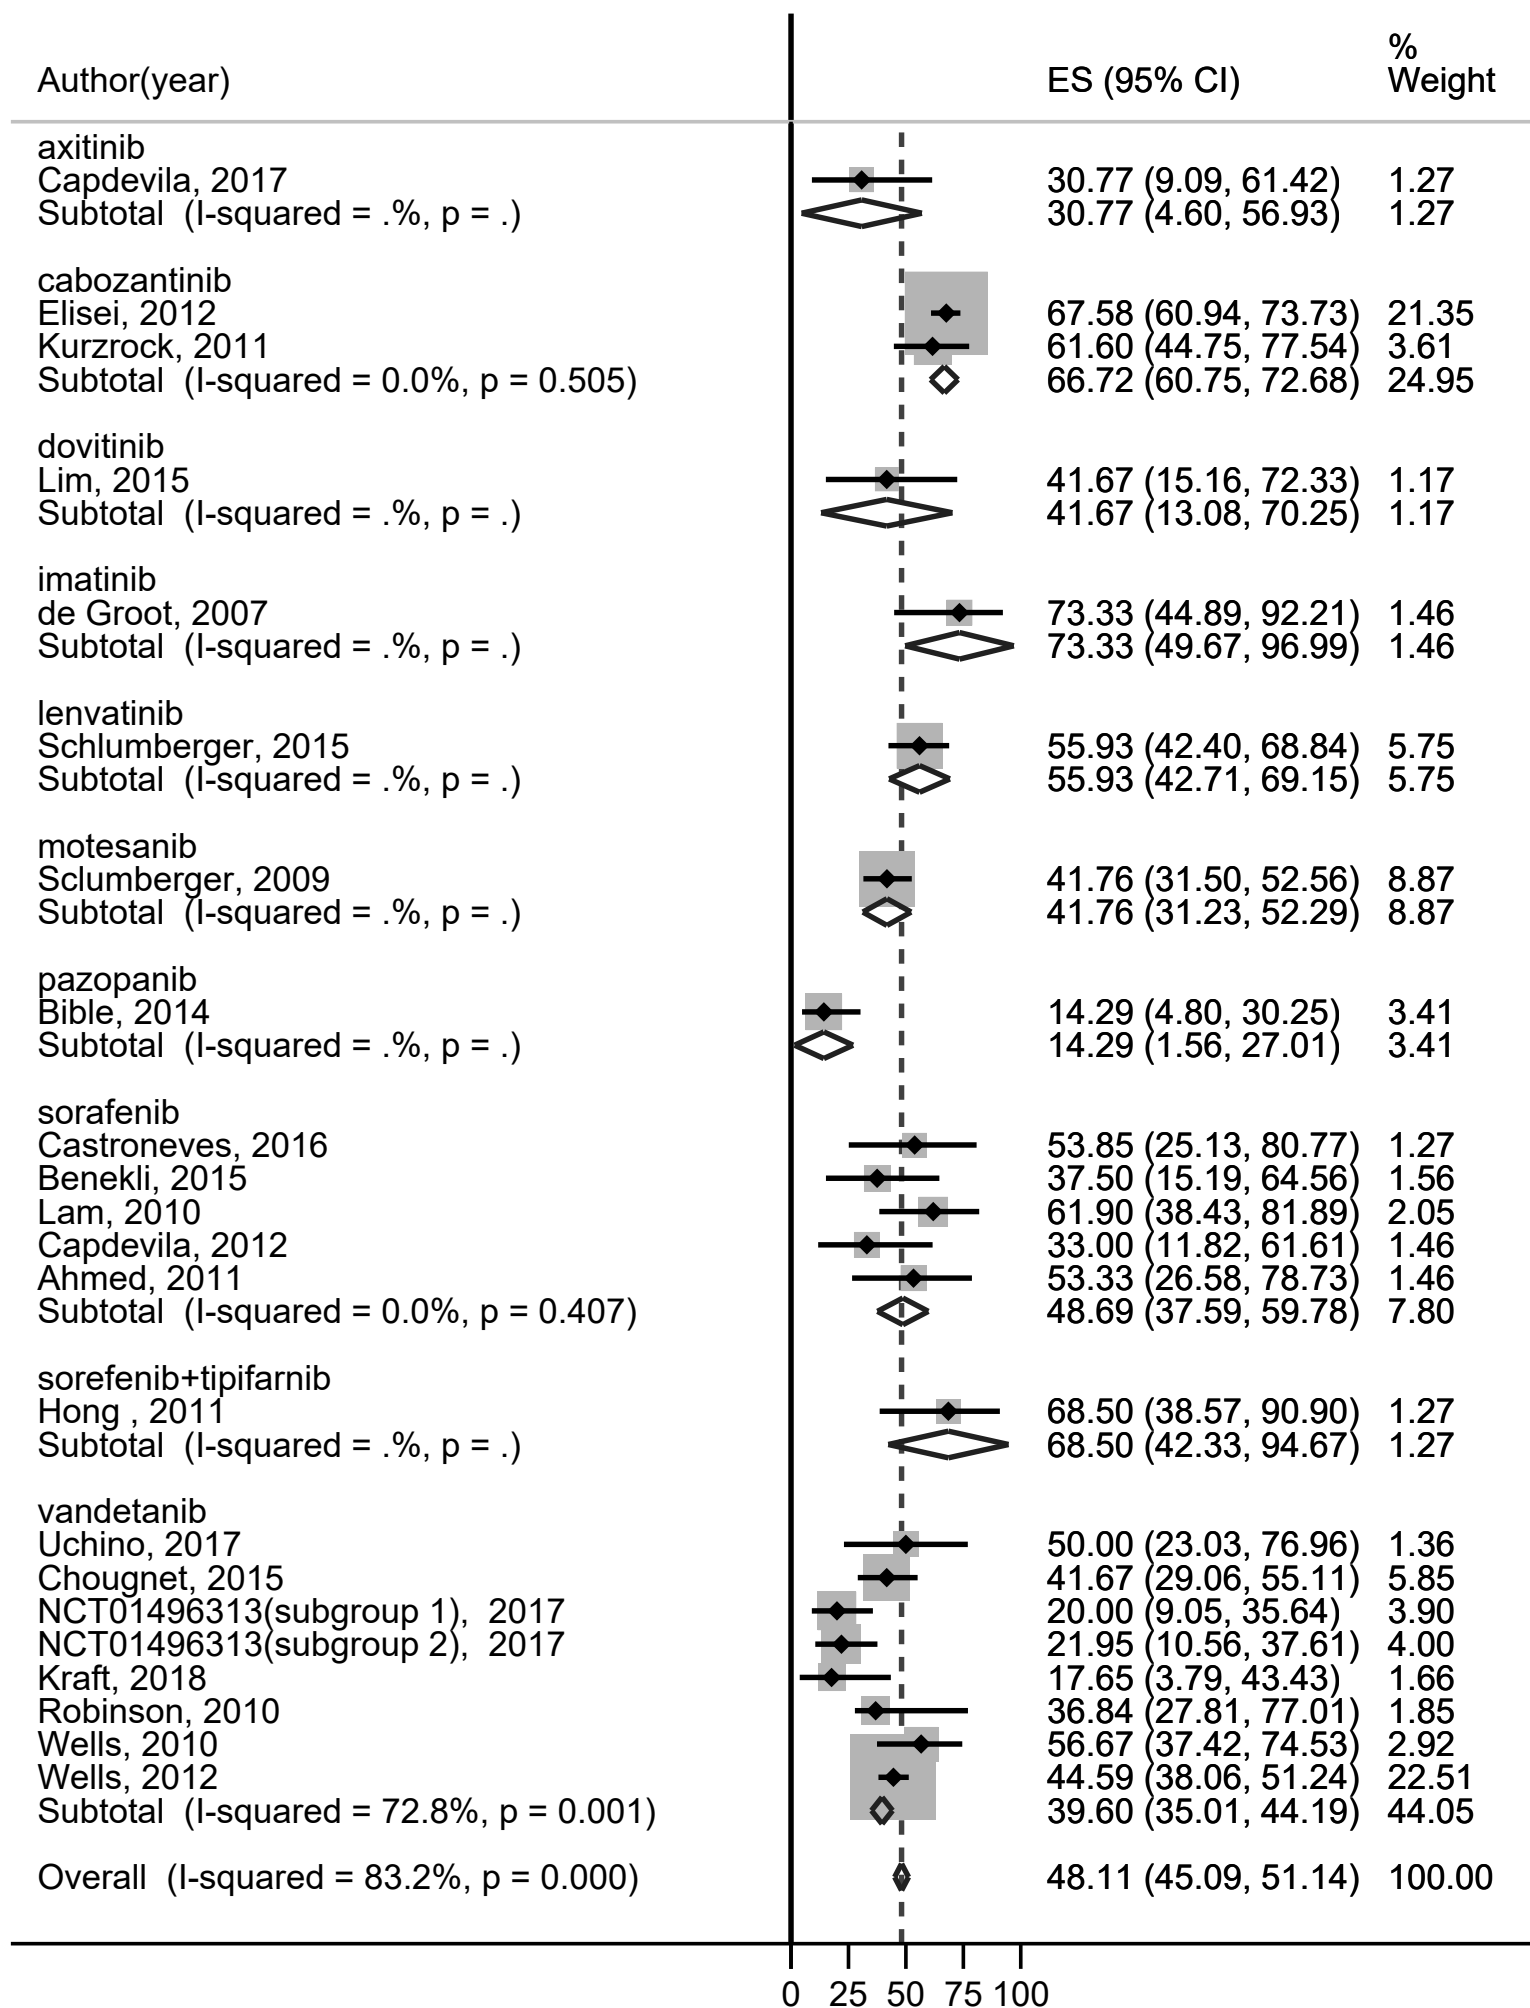

Supplement figure 11. Proportion of patients with Adverse Events grade  $\geq 3$  (G3AEs) in MTC studies with more than 10 patients. G3 AEs were reported in 48.1% [95%CI 45.1 – 51.1;  $Q=124.9$ ,  $X^2(d.f. 21)$ ,  $p<0.001$ ,  $I^2=83.2\%$ ] of patients ( $z=31.2$ ,  $p<0.001$ )
